# Supplementary material
Source: publisher site journal article supplement (https://www.spandidos-publications.com/6070/downloadSupplementary)

Figure S1. Knockdown of TFAP2E expression has a negligible effect on the drug sensitivity of oral squamous cell carcinoma cells. (A and C) Ca9-22 and (B and D) HSC-4 cells were transfected with siRNA-TFAP2E or siRNA-N/C. A total of 24 h after transfection, cells were treated with (A and B) CDDP or (C and D) H<sub>2</sub>O<sub>2</sub> at the indicated concentrations. A total of 24 h after treatment, cell viability was measured by water-soluble tetrazolium salt-8 assay. Data are presented as the mean  $\pm$  SD of quadruplicate measurements. CDDP, cisplatin; N/C, negative control; siRNA, small interfering RNA.

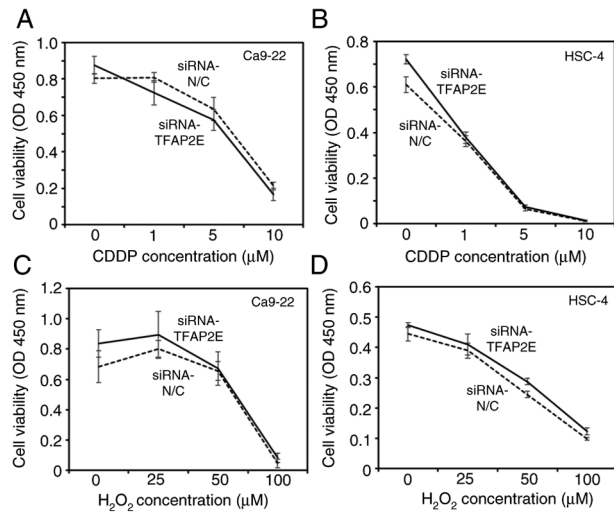

Figure S2. FACS analysis after TFAP2E knockdown showed no detectable effect on cell cycle progression based on DNA content. (A) Ca9-22 and (B) HSC-4 cells were transfected with siRNA-TFAP2E or siRNA-N/C and the culture medium was replaced with fresh medium containing nocodazole 2 days after transfection. Both floating and adherent cells were harvested at the indicated time points and subjected to FACS analysis. The percent distribution was calculated based on the Michael H. Fox algorithm. Analyses were performed at least three times and representative data are shown. FACS, fluorescence-activated cell sorting; N/C, negative control; siRNA, small interfering RNA.

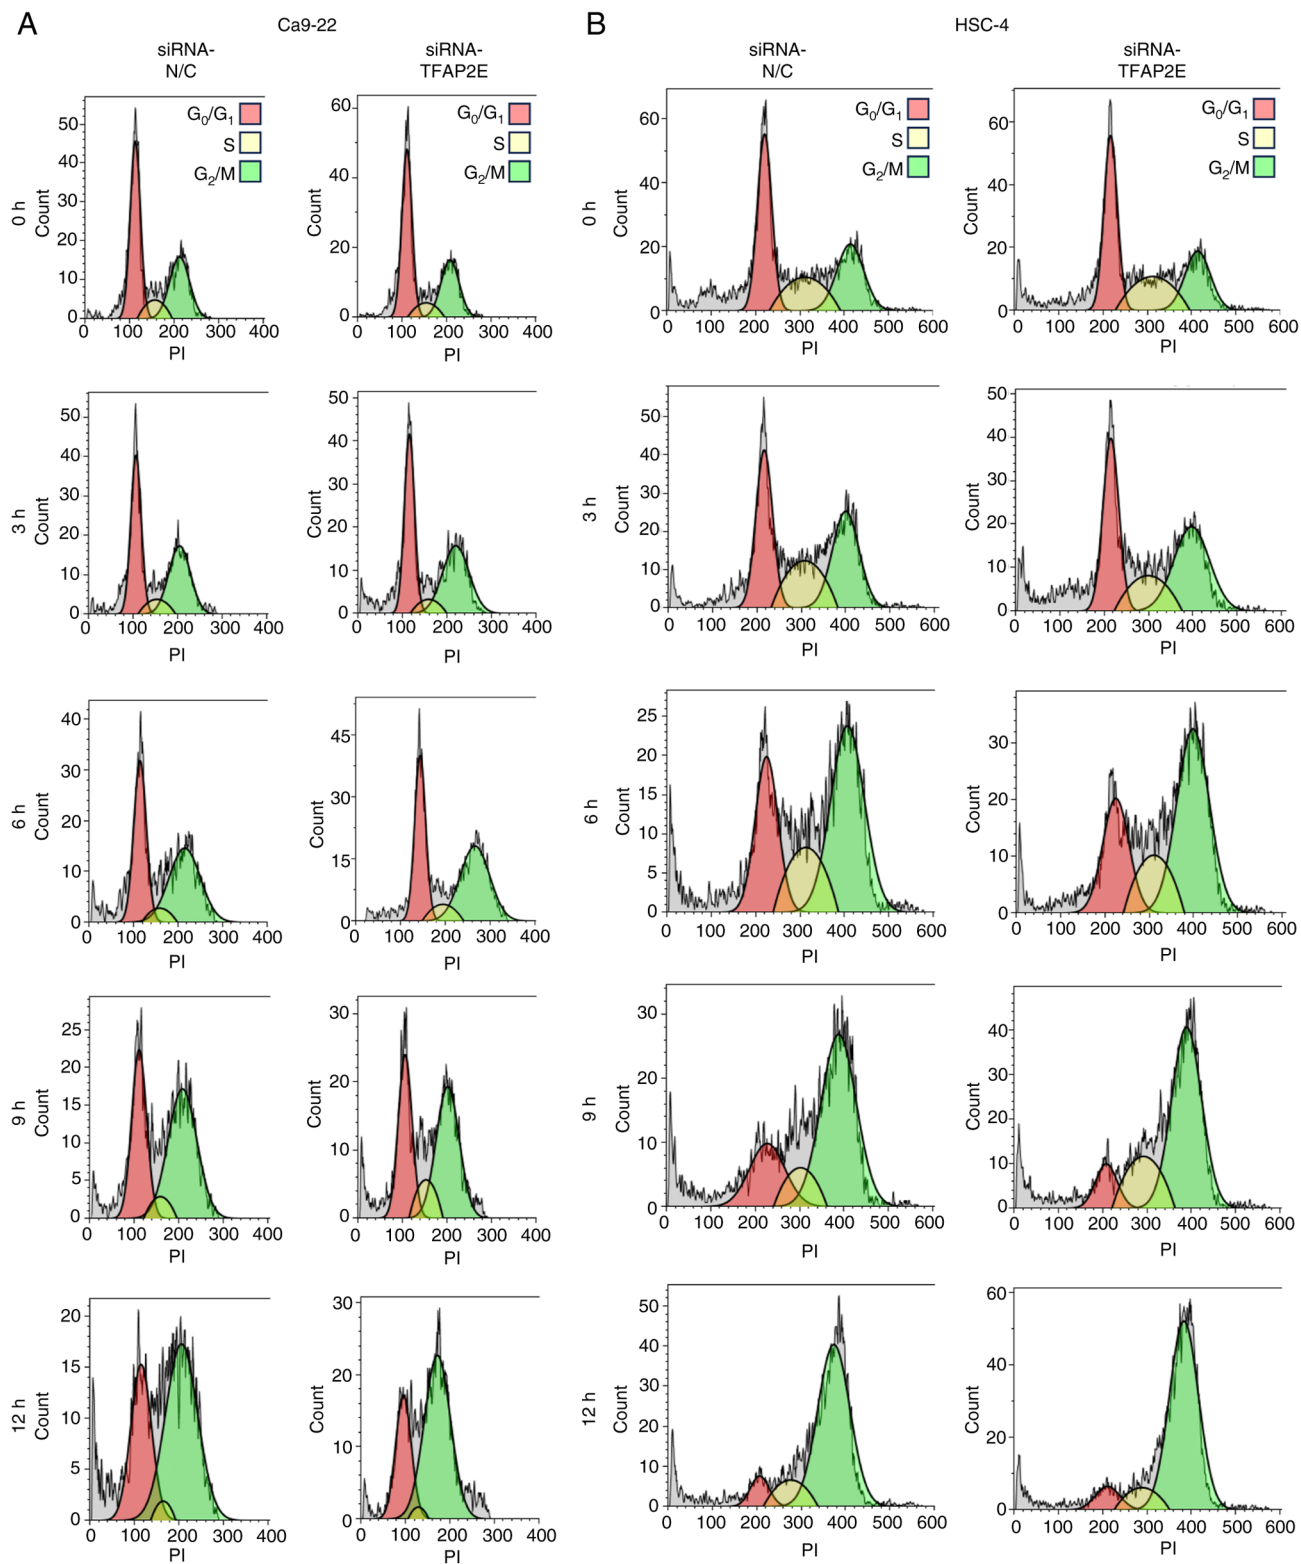

Figure S3. TFAP2E knockdown results in an earlier entry into M phase. (A) Ca9-22 and (B) HSC4 cells were transfected with siRNA-TFAP2E or siRNA-N/C and the culture medium was replaced with new medium containing nocodazole 2 days after transfection. Both floating and adherent cells were harvested at the indicated time points and subjected to fluorescence-activated cell sorting analysis. p-H3Ser28 is plotted against FS height, and p-H3Ser28 positive cells were gated in the square. The analyses were performed at least three times and representative plots are shown. FS, forward scatter; N/C, negative control; p-H3Ser28, phosphorylated histone H3 serine 28; siRNA, small interfering RNA.

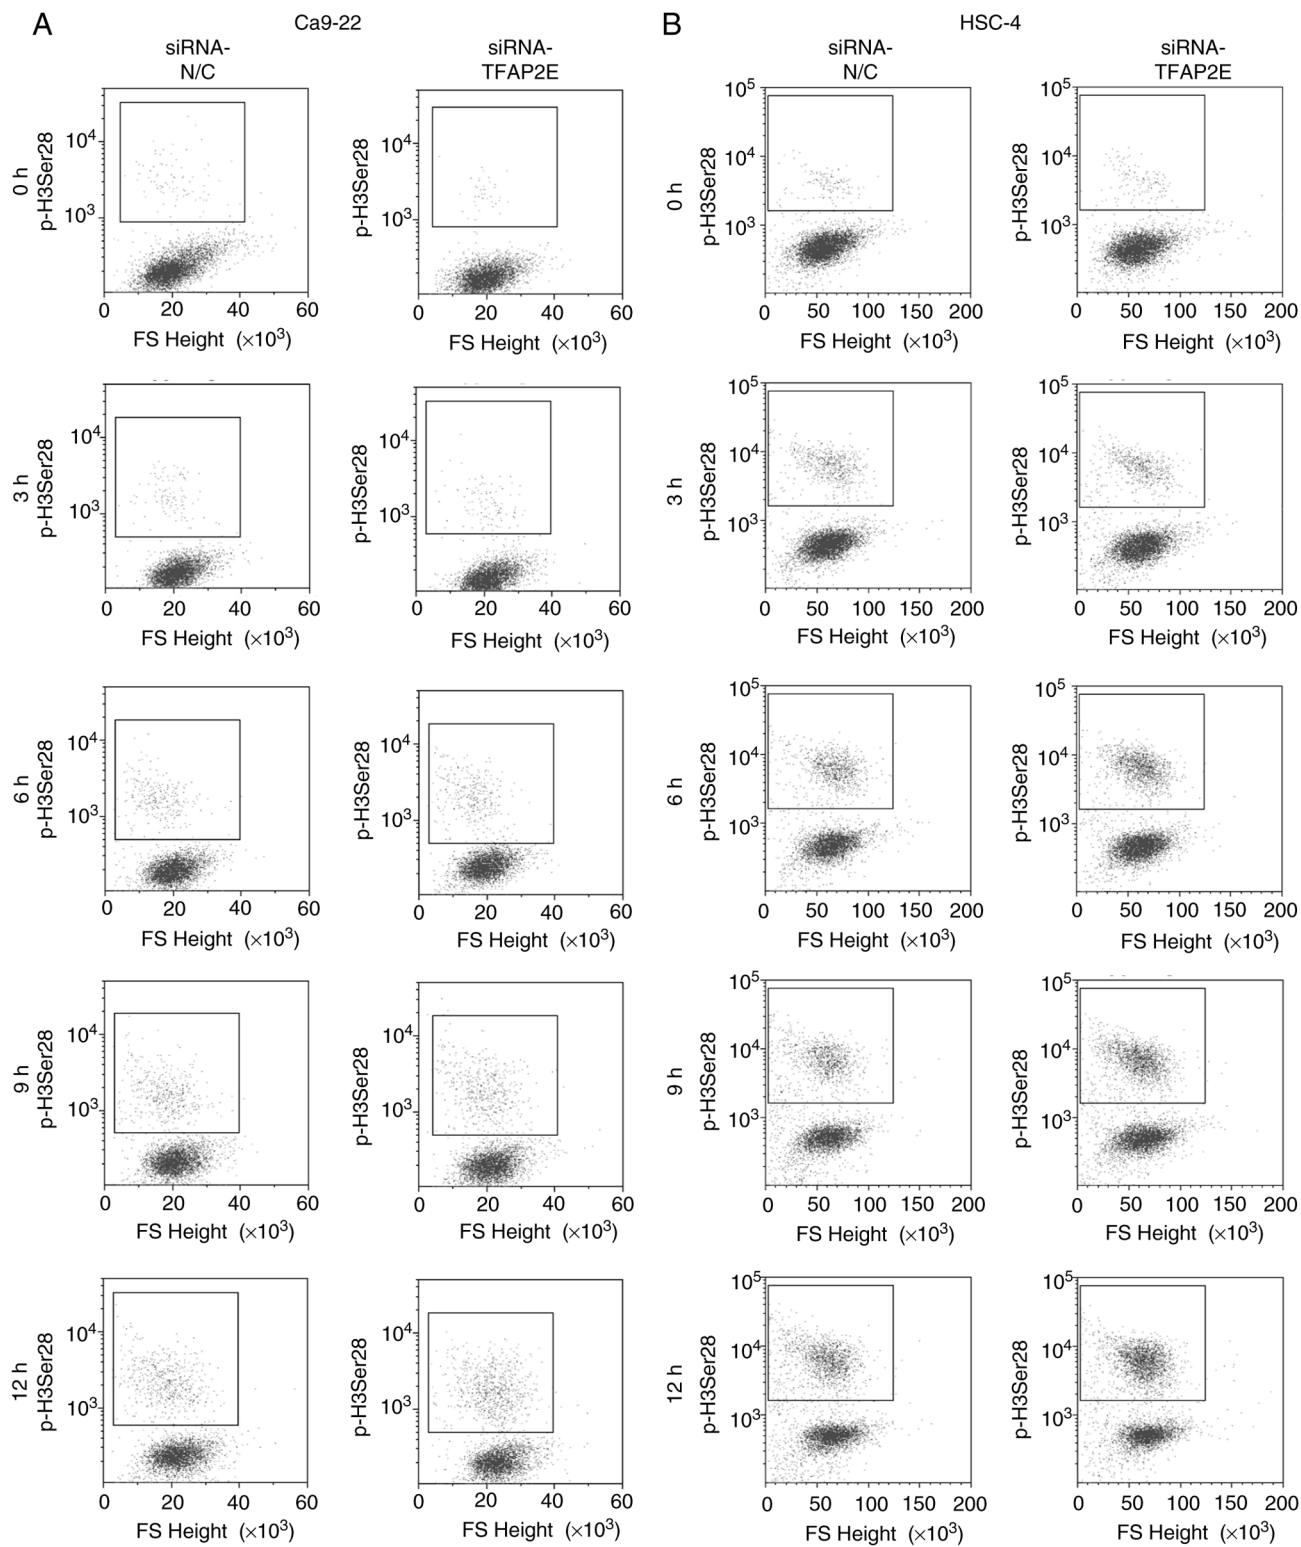

Figure S4. TP53 expression levels in TFAP2E-knockdown cells, and the effects of TP53 knockdown on cell proliferation. Ca9-22 and HSC-4 cells were transfected with siRNA-TFAP2E or siRNA-N/C. A total of 2 days after transfection, total RNA and cell lysates were prepared, and analyzed by (A) reverse transcription-quantitative PCR and (B) western blotting, respectively. Data are presented as the mean  $\pm$  SD of triplicate measurements. GAPDH was used as a loading control. Viability of (C) Ca9-22 and (E) HSC-4 cells was determined by water-soluble tetrazolium salt-8 assay 5 days after transfection with siRNA-TFAP2E, siRNA-TP53 or siRNA-N/C. Data are presented as the mean  $\pm$  SD of quadruplicate measurements. \* $P$ <0.05, \*\* $P$ <0.01. It was confirmed by reverse transcription-quantitative PCR that si-TP53 successfully suppressed TP53 expression 5 days after transfection in (D) Ca9-22 and (F) HSC-4 cells. Data are presented as the mean  $\pm$  SD of triplicate measurements. \*\* $P$ <0.01. N/C, negative control; siRNA, small interfering RNA.

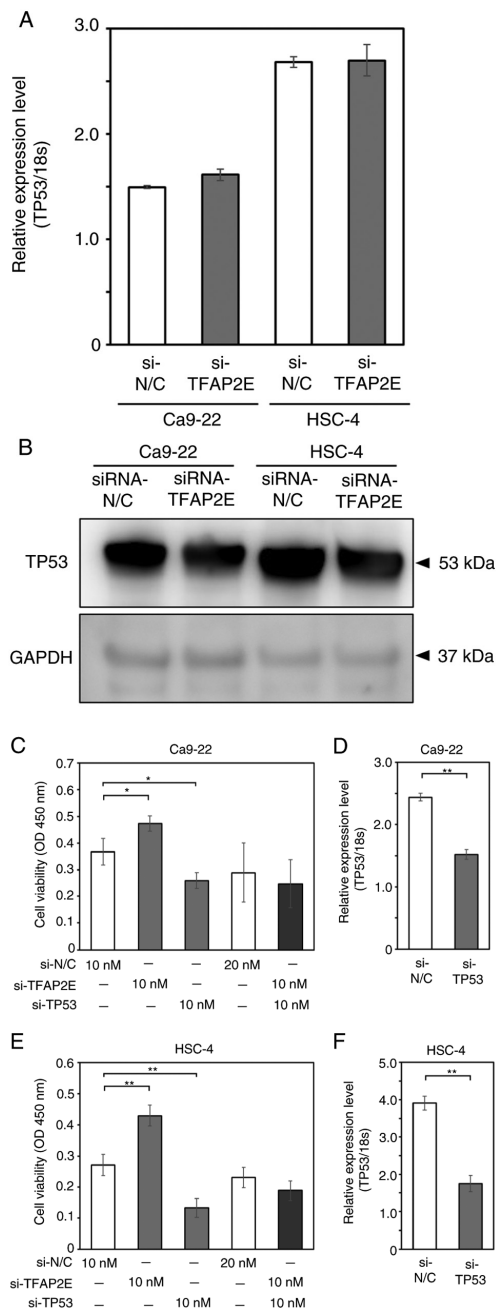

Supplement: Supplementary file 1 [file downloadSupplementary]
